# Supplementary material for: Electrohydrodynamics and hierarchical structure control: submicron-thick silica ribbons with an ordered hexagonal mesoporous structureElectronic supplementary information (ESI) available: characterisation. See http://www.rsc.org/suppdata/jm/b4/b406449f/
Source: Royal Society of Chemistry journal article supplement (doi:10.1039/b406449f), 2004-01-01
Supplement: b406449f.doc [file b406449f.doc]

{Supporting information}

Characterization

The temperature programmed oxidation apparatus we normally employ to treat sol-gel samples under flowing gases has been previously described [1]. In brief, 0.2 g of dried fibers were placed in a quartz U-tube reactor on top of a preheating bed of mullite pellets. A pre-dried air feed flow of 50 cm3/min was set with the aid of a Brooks 5850D mass-flow controller. The reactor was heated at a rate of 3.7°C/min from room temperature to 700°C and kept at this temperature for 3 hours.

FE-SEM micrographs were obtained with the aid of a Hitachi S-4700 at 5-15 keV. Samples were prepared by placing the fibers on aluminum sample holders using carbon tape. The fibers were sputtered coated with chromium to improve conductivity.

TEM of the samples was conducted in the bright-field mode with a JEOL JEM 2010 microscope at 200 keV. The ribbons were ground and mixed with distilled water to make a slurry that was deposited on a conventional carbon-coated Cu grid.

X-ray diffraction patterns were obtained in a Rigaku D/Max-B x-ray diffractometer with a conventional Cu target X-ray tube set to 40 KV and 30 mA. The sample was placed in a zero-background sample holder using a thin film of silicon grease.

Nitrogen sorption/desorption studies were performed at 77K in a Micromeritics ASAP 2010 apparatus. BET surface areas were determined from the adsorption isotherms, while pore size distributions were calculated from the desorption loop by using the BJH formalism.

References (supporting info)

1. “Hybrid TiO2-SiO2 Organic/Inorganic Gels: Preparation, Characterization, and Temperature-programmed Pyrolysis and Oxidation Studies,” G. Larsen, J. Wagner, D. Vu, C. Nguyen and E. Lotero, *Chem. Mater.*, **10**, 3756 (1998).
